# Supplementary material for: Diversity of the Tryptophanase Gene and Its Evolutionary Implications in Living Organisms
Source: MDPI journal article supplement (doi:10.3390/microorganisms9102156), 2021-10-15
Supplement: s1 [file s1]

## **Supplementary material**

### **Diversity of the tryptophanase gene and its evolutionary implications in living organisms**

Bharath Reddy Boya, Prasun Kumar, Jin-Hyung Lee, and Jintae Lee\*

School of Chemical Engineering, Yeungnam University, 280 Daehak-Ro, Gyeongsan  
38541, Republic of Korea

**\*Corresponding author:**

E-mail: [jtlee@ynu.ac.kr](mailto:jtlee@ynu.ac.kr), Phone: +82-53-810-2533, Fax: +82-53-810-4631

**Table S1.** % GC content of all the species sequences

| Organism                                                    | %GC<br>content | Organism                                                     | %GC<br>content |
|-------------------------------------------------------------|----------------|--------------------------------------------------------------|----------------|
| 1162092-1165253 <i>Acropora digitifera</i>                  | 42             | <i>Histophilus somni</i> strain USDA-ARS-USMARC-63368        | 38             |
| 121674-126752 <i>Acropora digitifera</i>                    | 44             | <i>Klebsiella michiganensis</i> strain 4928STDY7071129       | 57             |
| 39236-46093 <i>Stylophora pistillata</i> isolate CSM Monaco | 41             | <i>Klebsiella oxytoca</i> 10-5243 strain Oct-43              | 56             |
| 46873-52854 <i>Stylophora pistillata</i> isolate CSM Monaco | 39             | <i>Leclercia adecarboxylata</i> strain USDA-ARS-USMARC-60222 | 51             |
| 682667-687350 <i>Pocillopora damicornis</i>                 | 42             | <i>Limulus polyphemus</i>                                    | 38             |
| <i>Acropora digitifera</i>                                  | 41             | <i>Metarhizium acridum</i> CQMa 102                          | 53             |
| <i>Acropora millepora</i> isolate SF001                     | 39             | <i>Metarhizium brunneum</i> ARSEF 3297                       | 52             |
| <i>Acropora millepora</i> isolate SF001                     | 43             | <i>Metarhizium robertsii</i> ARSEF 23                        | 53             |
| <i>Actinia tenebrosa</i>                                    | 39             | <i>Monoraphidium neglectum</i> strain SAG 48.87              | 65             |
| <i>Aeromonas caviae</i> strain NCTC12244                    | 64             | <i>Moritella viscosa</i>                                     | 40             |
| <i>Aeromonas dhakensis</i> strain KOR1                      | 65             | <i>Naegleria gruberi</i> strain NEG-M                        | 36             |
| <i>Aeromonas hydrophila</i> strain ZYAH75                   | 64             | <i>Natrarchaeobaculum sulfurreducens</i> strain AArc1        | 67             |
| <i>Aeromonas media</i> strain BAQ071013-115                 | 64             | <i>Natrarchaeobaculum sulfurreducens</i> strain AArc-Mg      | 67             |
| <i>Aeromonas salmonicida</i> strain O23A                    | 62             | <i>Natrialba magadii</i> ATCC 43099                          | 66             |
| <i>Aeromonas veronii</i> B565                               | 64             | <i>Natrinema pallidum</i> strain BOL6-1                      | 66             |
| <i>Aeropyrum pernix</i> K1                                  | 56             | <i>Natrinema pellirubrum</i> DSM 15624                       | 68             |
| <i>Aggregatibacter actinomycetemcomitans</i> strain VT1169  | 46             | <i>Natrinema</i> sp. J7-2                                    | 66             |
| <i>Akkermansia muciniphila</i> strain YL44                  | 59             | <i>Natrinema versiforme</i> strain BOL5-4                    | 69             |

|                                                          |    |                                                           |    |
|----------------------------------------------------------|----|-----------------------------------------------------------|----|
| <i>Aliivibrio wodanis</i> AWOD1                          | 41 | <i>Natronobacterium gregoryi</i> SP2                      | 65 |
| <i>Anaerotruncus colihominis</i> DSM 17241               | 54 | <i>Natronococcus occultus</i> SP4                         | 68 |
| <i>Aspergillus aculeatinus</i> CBS 121060                | 65 | <i>Natronorubrum aibiense</i> strain 7-3                  | 66 |
| <i>Aspergillus aculeatus</i> ATCC 16872                  | 63 | <i>Natronorubrum bangense</i> strain JCM 10635            | 65 |
| <i>Aspergillus brunneoviolaceus</i> CBS 621.78           | 65 | <i>Nematostella vectensis</i> strain CH2xCH6              | 44 |
| <i>Aspergillus japonicus</i> CBS 114.51                  | 62 | <i>Octopus bimaculoides</i> isolate UCB-OBI-ISO-001       | 38 |
| <i>Aspergillus saccharolyticus</i> JOP 1030-1            | 65 | <i>Octopus vulgaris</i> isolate Ov201803                  | 40 |
| <i>Aspergillus uvarum</i> CBS 121591                     | 64 | <i>Odoribacter splanchnicus</i> strain An45               | 43 |
| <i>Bacteroides cellulosilyticus</i> strain WH2           | 46 | <i>Orbicella faveolata</i>                                | 41 |
| <i>Bacteroides eggerthii</i> strain NCTC11155            | 45 | <i>Orbicella faveolata</i>                                | 41 |
| <i>Bacteroides faecis</i> MAJ27                          | 46 | <i>Orbicella faveolata</i> isolate FL                     | 40 |
| <i>Bacteroides intestinalis</i> DSM 17393                | 46 | <i>Paeniclostridium sordellii</i> strain AM370            | 32 |
| <i>Bacteroides ovatus</i> strain BSD2780061688st1_C6     | 47 | <i>Pantoea ananatis</i> PA13                              | 48 |
| <i>Bacteroides salyersiae</i> CL02T12C01                 | 46 | <i>Pantoea stewartii</i> strain A206                      | 50 |
| <i>Bacteroides stercoris</i> ATCC 43183                  | 44 | <i>Paraclostridium bifermentans</i> ATCC638               | 33 |
| <i>Bacteroides thetaiotaomicron</i> strain 7330          | 48 | <i>Penicillium chrysogenum</i> Wisconsin                  | 51 |
| <i>Bacteroides uniformis</i> strain 2789STDY5834847      | 53 | <i>Phaeodactylum tricornutum</i> CCAP                     | 48 |
| <i>Blastocystis hominis</i> , Singapore isolate B        | 56 | <i>Photorhabdus laumondii</i> subsp. laumondii strain DJC | 40 |
| <i>Blastocystis</i> sp. subtype 4 strain WR1             | 57 | <i>Photorhabdus luminescens</i> strain HIM3               | 40 |
| <i>Brachyspira hyodysenteriae</i> ATCC 27164 strain B-78 | 32 | <i>Plesiomonas shigelloides</i> strain FDAARGOS_725       | 53 |
| <i>Brachyspira hyodysenteriae</i> WA1                    | 32 | <i>Pocillopora damicornis</i>                             | 43 |
| c138856-133320 <i>Exaiptasia pallida</i> isolate CC7     | 38 | <i>Podospora anserina</i> S mat+                          | 56 |
| c33648-26504 <i>Exaiptasia pallida</i> isolate CC7       | 39 | <i>Porphyromonas gingivalis</i> ATCC33277                 | 48 |
| c692470-687622 <i>Pocillopora damicornis</i>             | 41 | <i>Porphyromonas gulae</i> strain COT-052                 | 49 |
| <i>Chromobacterium violaceum</i> strain 16-419A          | 68 | <i>Prevotella intermedia</i> strain KCOM 1949             | 48 |
| <i>Chryseobacterium indologenes</i> strain NCTC10796     | 39 | <i>Priapulus caudatus</i>                                 | 46 |

|                                                             |    |                                                       |    |
|-------------------------------------------------------------|----|-------------------------------------------------------|----|
| <i>Citrobacter amalonaticus</i> strain FDAARGOS_122         | 48 | <i>Proteus vulgaris</i> strain ATCC 49132             | 37 |
| <i>Citrobacter koseri</i> ATCC BAA-895                      | 55 | <i>Providencia alcalifaciens</i> strain FDAARGOS_408  | 41 |
| <i>Citrobacter portucalensis</i> strain FDAARGOS_738        | 50 | <i>Providencia rettgeri</i> strain YPR31              | 38 |
| <i>Clostridium novyi</i> NT                                 | 31 | <i>Providencia stuartii</i> MRSN 2154                 | 40 |
| <i>Clostridium tetani</i> E88                               | 34 | <i>Raoultella ornithinolytica</i> strain 172117885    | 56 |
| <i>Colletotrichum graminicola</i> M1.001                    | 56 | <i>Rhodobacter capsulatus</i> strain DSM 1710         | 64 |
| <i>Cronobacter dublinensis</i> subsp. dublinensis LMG 23823 | 56 | <i>Rhodopseudomonas palustris</i> strain CGMCC 1.2180 | 64 |
| <i>Cutibacterium acnes</i> KPA171202                        | 59 | <i>Rodentibacter pneumotropicus</i> strain Ln316_4    | 41 |
| <i>Dickeya dadantii</i> 3937                                | 59 | <i>Saccharopolyspora erythraea</i> NRRL2338           | 71 |
| <i>Dickeya dianthicola</i> strain ME23                      | 59 | <i>Saccoglossus kowalevskii</i>                       | 45 |
| <i>Dickeya solani</i> IPO 2222                              | 59 | <i>Salinibacter ruber</i> DSM 13855                   | 67 |
| <i>Dickeya zeae</i> EC1                                     | 57 | <i>Shigella boydii</i> strain 600384                  | 50 |
| <i>Dictyostelium purpureum</i>                              | 32 | <i>Shigella dysenteriae</i> strain BCW_4872           | 50 |
| <i>Drosophila melanogaster</i> chromosome 3L                | 47 | <i>Shigella flexneri</i> 2a str. 301                  | 50 |
| <i>Drosophila melanogaster</i> chromosome 3R                | 48 | <i>Shigella sonnei</i> strain ECSW+14                 | 51 |
| <i>Edwardsiella piscicida</i> strain LADL99-462             | 57 | <i>Streptomyces scabiei</i> 87.22                     | 72 |
| <i>Edwardsiella tarda</i> strain LADL88-209                 | 55 | <i>Stylophora pistillata</i> isolate CSM Monaco       | 43 |
| <i>Elizabethkingia anophelis</i> R26                        | 39 | <i>Treponema denticola</i> ATCC 35405                 | 41 |
| <i>Elizabethkingia meningoseptica</i> strain NCTC10016      | 40 | <i>Treponema phagedenis</i> 4A                        | 45 |
| <i>Elizabethkingia miricola</i> strain FL160902             | 39 | <i>Treponema phagedenis</i> strain B43.1              | 45 |
| <i>Entamoeba dispar</i> SAW760                              | 34 | <i>Trichoderma virens</i> Gv29-8                      | 46 |
| <i>Entamoeba histolytica</i> HM-1                           | 33 | <i>Trichomonas vaginalis</i> G3                       | 48 |
| <i>Entamoeba invadens</i> IP1                               | 41 | <i>Vibrio alginolyticus</i> strain FA2                | 47 |
| <i>Entamoeba nuttalli</i> P19                               | 33 | <i>Vibrio anguillarum</i> 96F contig00051             | 47 |
| <i>Enterocloster clostridioformis</i> strain FDAARGOS_739   | 44 | <i>Vibrio campbellii</i> strain 1114GL                | 49 |

|                                                                     |    |                                                   |    |
|---------------------------------------------------------------------|----|---------------------------------------------------|----|
| <i>Enterovibrio norvegicus</i> strain 10N.261.49.F5                 | 52 | <i>Vibrio cholerae</i> MS6                        | 48 |
| <i>Escherichia albertii</i> strain EC06-170                         | 49 | <i>Vibrio coralliilyticus</i> strain OfT6-21      | 48 |
| <i>Escherichia coli</i> O157:H7 str. Sakai                          | 51 | <i>Vibrio crassostreae</i> strain 16BF1_28        | 47 |
| <i>Escherichia coli</i> str. K-12 MG1655                            | 51 | <i>Vibrio cyclitrophicus</i> strain ECSMB14105    | 46 |
| <i>Escherichia fergusonii</i> strain RHB18-C03                      | 51 | <i>Vibrio diabolicus</i> strain FA3               | 47 |
| <i>Escherichia marmotae</i> strain UMB2500_14                       | 50 | <i>Vibrio fluvialis</i> strain FDAARGOS_104       | 54 |
| <i>Folsomia candida</i> strain VU                                   | 42 | <i>Vibrio furnissii</i> strain FDAARGOS_777       | 55 |
| <i>Fusarium fujikuroi</i> IMI 58289                                 | 50 | <i>Vibrio jasicida</i> 090810c                    | 47 |
| <i>Fusarium proliferatum</i> ET1                                    | 50 | <i>Vibrio kanaloae</i> strain CCUG 56968          | 46 |
| <i>Fusarium vanettenii</i>                                          | 58 | <i>Vibrio lentus</i> strain 10N.286.45.C8         | 47 |
| <i>Fusobacterium hwasookii</i> ChDC                                 | 34 | <i>Vibrio metoecus</i> strain YB5B04              | 48 |
| <i>Fusobacterium hwasookii</i> ChDC F300                            | 31 | <i>Vibrio mimicus</i> MB451                       | 48 |
| <i>Fusobacterium necrophorum</i> subsp. funduliforme strain 1_1_36S | 40 | <i>Vibrio nigripulchritudo</i>                    | 50 |
| <i>Fusobacterium nucleatum</i> subsp. nucleatum ATCC 25586          | 33 | <i>Vibrio owensii</i> strain XSBZ03               | 48 |
| <i>Fusobacterium nucleatum</i> subsp. polymorphum strain NCTC10562  | 33 | <i>Vibrio rotiferianus</i> strain B64D1           | 48 |
| <i>Grimontia hollisae</i> strain FDAARGOS_111                       | 52 | <i>Vibrio splendidus</i>                          | 47 |
| <i>Haemophilus haemolyticus</i> strain NCTC10839                    | 40 | <i>Vibrio tasmaniensis</i> strain UCD-FRSSP16_25  | 47 |
| <i>Haemophilus influenzae</i> R2866                                 | 40 | <i>Vibrio vulnificus</i> MO6-24/O                 | 50 |
| <i>Haemophilus influenzae</i> strain Hi375                          | 40 | <i>Xenorhabdus bovienii</i> str. puntauense       | 43 |
| <i>Haemophilus influenzae</i> strain NML-Hia-1                      | 40 | <i>Yersinia enterocolitica</i> strain ERL053484   | 48 |
| <i>Haemophilus parainfluenzae</i> T3T1                              | 39 | <i>Yersinia frederiksenii</i> ATCC 33641          | 48 |
| <i>Halalkalicoccus jeotgali</i> B3                                  | 65 | <i>Yersinia intermedia</i> strain CFSAN060537     | 49 |
| <i>Halanaeroarchaeum sulfurreducens</i> strain HSR2                 | 67 | <i>Yersinia kristensenii</i> strain Y231          | 49 |
| <i>Halanaeroarchaeum sulfurreducens</i> strain M27-SA2              | 67 | <i>Yersinia massiliensis</i> strain SCPM-O-B-8025 | 49 |
| <i>Haloarcula hispanica</i> ATCC 33960                              | 64 | <i>Yokenella regensburgei</i> strain NCTC11966    | 44 |

|                                                  |    |                                               |    |
|--------------------------------------------------|----|-----------------------------------------------|----|
| <i>Haloarcula hispanica</i> N601                 | 64 | <i>Halopiger xanaduensis</i> SH-6             | 69 |
| <i>Haloarcula marismortui</i> ATCC 43049         | 63 | <i>Haloprofundus sp.</i> MHR1                 | 68 |
| <i>Haloarcula sp.</i> CBA1115                    | 64 | <i>Halostagnicola larsenii</i> XH-48          | 65 |
| <i>Haloarcula taiwanensis</i> strain Taiwanensis | 64 | <i>Halostella pelagica</i> strain DL-M4       | 67 |
| <i>Halobacterium hubeiense</i> strain JI20-1     | 71 | <i>Haloterrigena daqingensis</i> strain JX313 | 67 |
| <i>Halobacterium salinarum</i> NRC-1             | 71 | <i>Haloterrigena jeotgali</i> strain A29      | 68 |
| <i>Halobacterium salinarum</i> R1                | 71 | <i>Haloterrigena turkmenica</i> DSM 5511      | 69 |
| <i>Halobacterium salinarum</i> strain 91-R6      | 71 | <i>Haloferax gibbonsii</i> strain ARA6        | 68 |
| <i>Halobacterium sp.</i> DL1                     | 71 | <i>Haloferax mediterranei</i> ATCC 33500      | 63 |
| <i>Halobiforma lacisalsi</i> AJ5                 | 69 | <i>Haloferax volcanii</i> DS2                 | 68 |
| <i>Haloferax alexandrinus</i> strain wsp1        | 68 | <i>Halogeometricum borinquense</i> DSM 11551  | 63 |

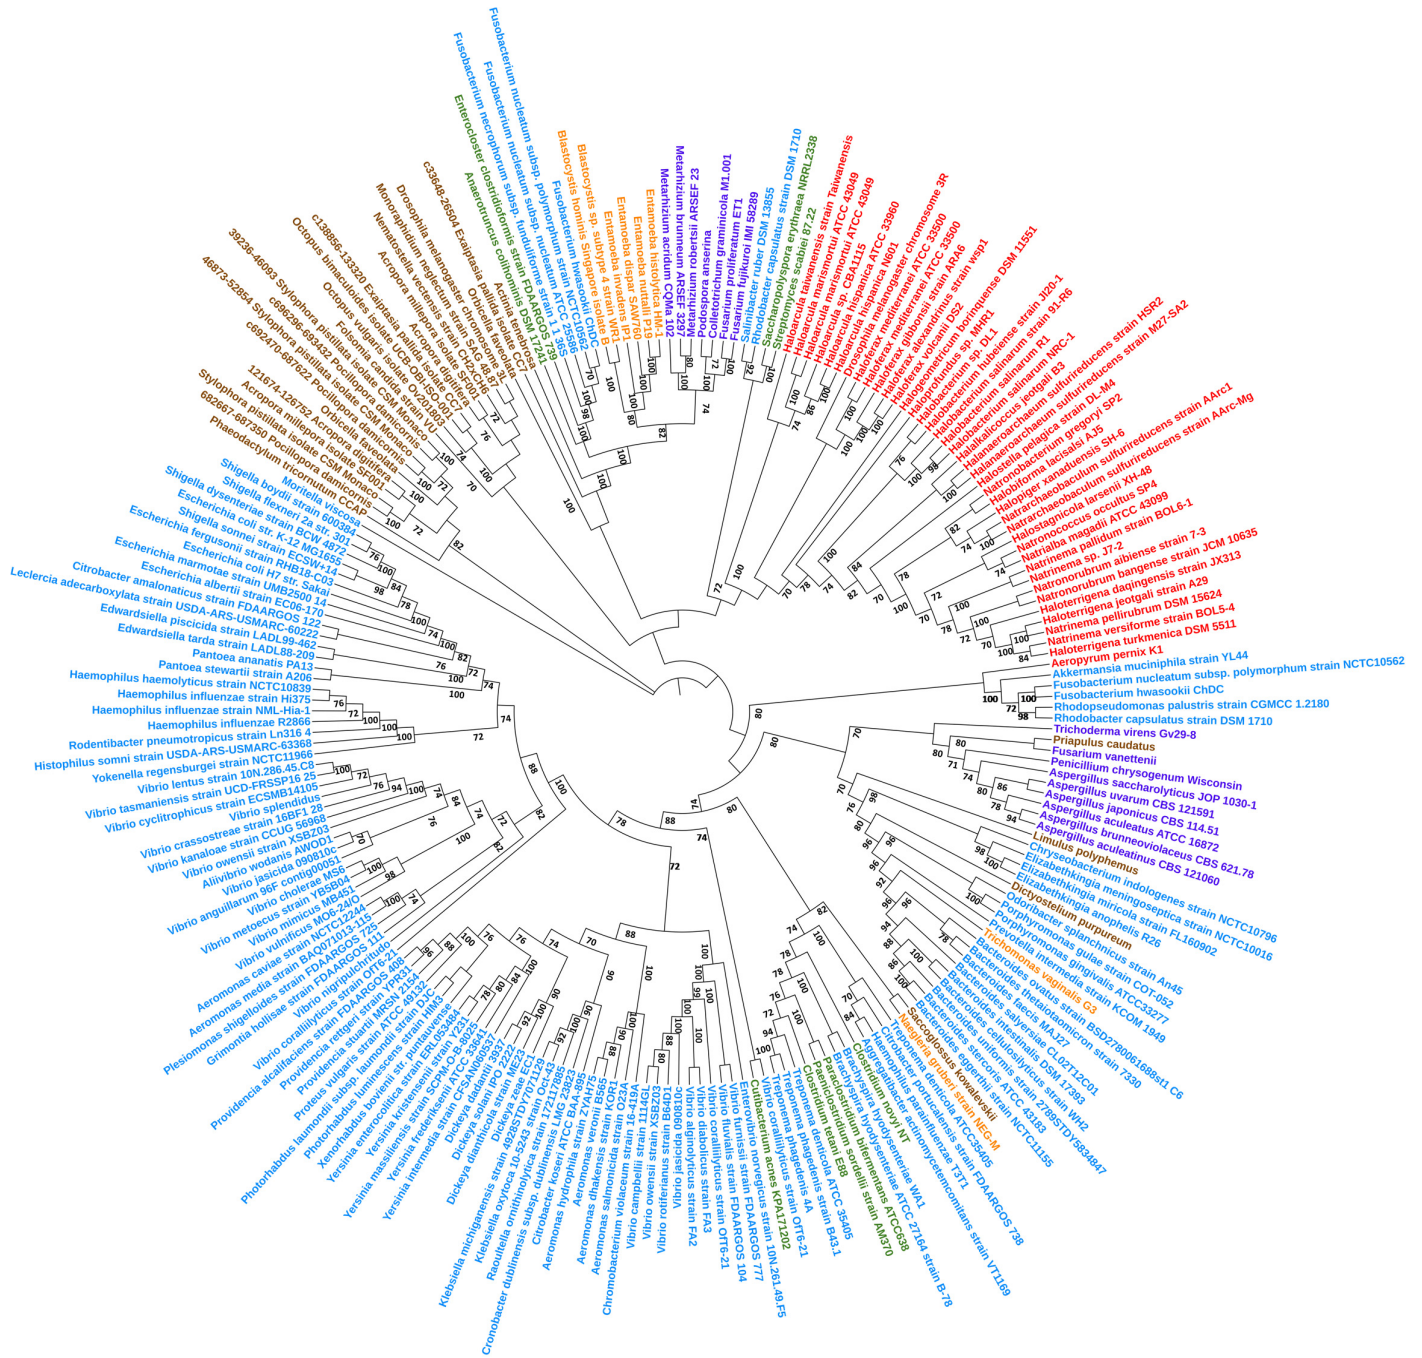

**Figure S1.** Nucleotide sequence phylogenetic tree (arbitrarily rooted maximum likelihood tree) of the *trnA* gene representing a total of 221 nucleotide sequences belonging to 95 genera of various taxonomic groups. All the nodes represent bootstrap values  $\geq 70$  (1000 replications). Details of the phylogenetic analysis are provided in Methods. A complete list of genera and species and their taxonomic classifications are provided in Table 1. Species names are labelled according to phylogenetic classifications by the following colour codes. Gram-negative bacteria (blue), Gram-positive bacteria (green), archaea (red), unicellular eukaryotes (orange), higher eukaryotes (brown).



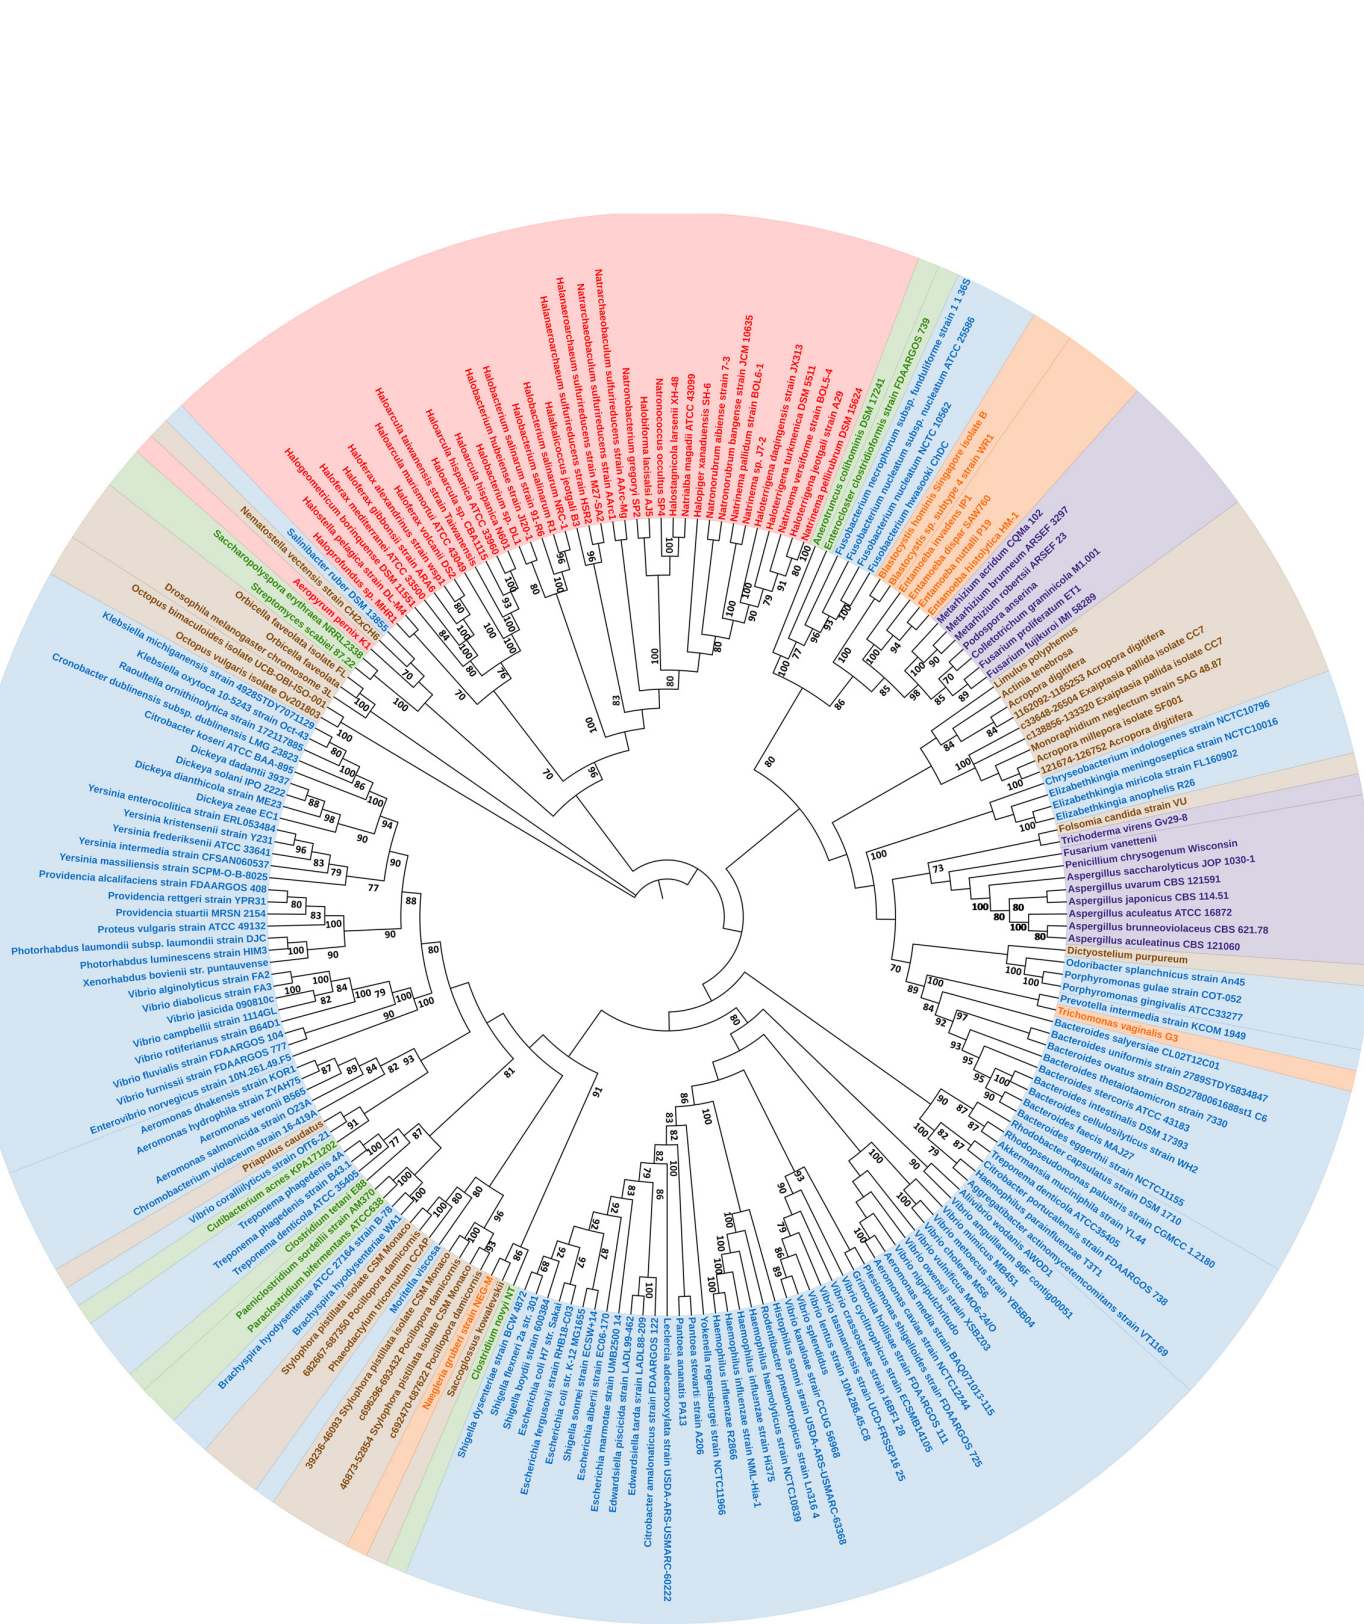

**Figure S2.** Amino acid sequence phylogenetic tree (arbitrarily rooted maximum likelihood tree) of the *tnaA* gene representing a total of 221 amino acid sequences belonging to 95 genera of various taxonomic groups. All the nodes represent bootstrap values  $\geq 70$  (1000 replications). Details of the phylogenetic analysis are provided in Methods. A complete list of genera and species and their taxonomic classifications are provided in Table 1. Species names are labelled according to phylogenetic classifications by the following colour codes. Gram-negative bacteria (blue), Gram-positive bacteria (green), archaea (red), fungi (purple), unicellular eukaryotes (orange), higher eukaryotes (brown).
